# Supplementary material for: Fabrication of a superhydrophobic mesh based on PDMS/SiO2 nanoparticles/PVDF microparticles/KH-550 by one-step dip-coating method
Source: PubMed Central journal article supplement — RSC Adv. 2018 May 1;8(29):16251–9. doi: 10.1039/c8ra03262a (PMC9080276; doi:10.1039/c8ra03262a), 2018-05-01
Supplement: RA-008-C8RA03262A-s005.pdf [file RA-008-C8RA03262A-s005.pdf]

**Fabrication of a superhydrophobic mesh based on PDMS /SiO<sub>2</sub> nanoparticles/PVDF microparticles/KH-550 by one-step dip-coating method**

Zhonglin Luo,<sup>\*abc</sup> Yan Li,<sup>a</sup> Cong Duan,<sup>a</sup> Biaobing Wang<sup>\*ab</sup>

<sup>a</sup> School of Material Science and Engineering, National Experimental Demonstration Center for Materials Science and Engineering (Changzhou University), Changzhou, 213164, P.R. China

<sup>b</sup> Jiangsu Collaborative Innovation Center of Photovoltaic Science and Engineering, Changzhou, Jiangsu, 213164, P.R. China

<sup>c</sup> State Key Laboratory of Molecular Engineering of Polymers (Fudan University), Shanghai, 200433, P.R. China

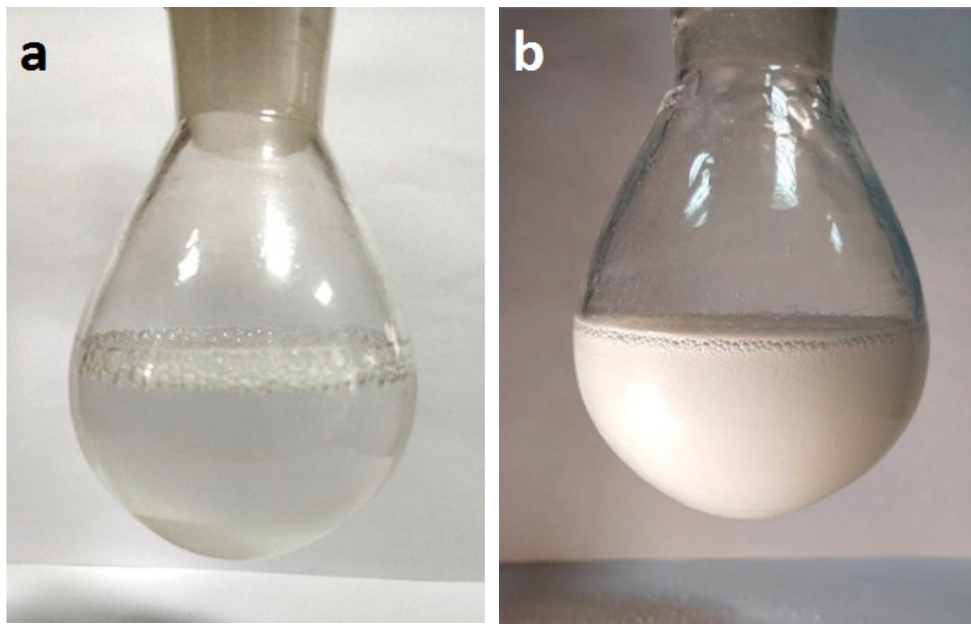

Fig. S1 (a) 2.5 g PDMS, 1.73 g PVDF and 0.433 g KH-550 were added to 50 ml of toluene, stir for 5 hours and stand for 10 minutes. The solution is clearly delaminated and PVDF sinks to the bottom (b) 2.5g PDMS, 3.125g SiO<sub>2</sub>, 1.73g PVDF and 0.433g KH-550 were added to 50ml of toluene, stir for 5 hours and stand for 10 minutes. A paint-like suspension is formed.

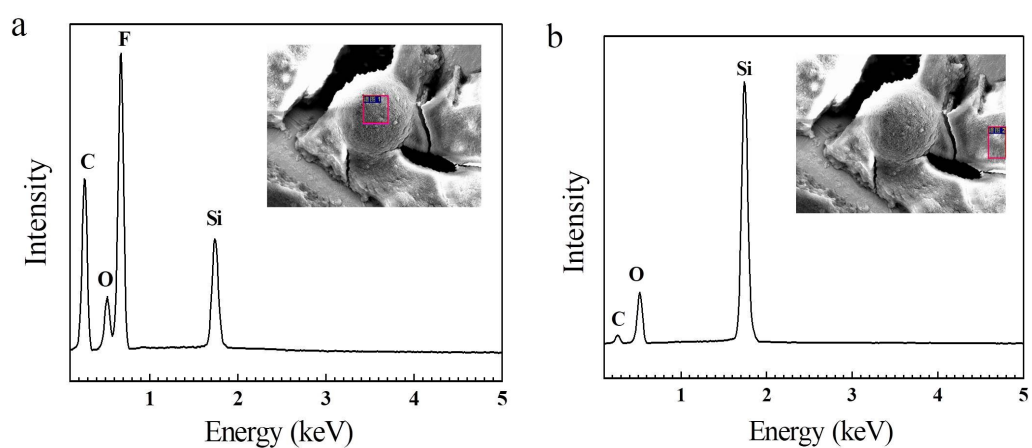

Fig. S2 EDS spectra of the PDMS/SiO<sub>2</sub>/PVDF/KH-550 coating in different areas. (a) on the PVDF micro-particles, (b) without PVDF micro-particles.

Table S1. The elemental fractions in different areas of the PDMS/SiO<sub>2</sub>/PVDF/KH-550 coating.

| Region                       | Element mass fraction /% |      |       |       |       |      |
|------------------------------|--------------------------|------|-------|-------|-------|------|
|                              | C                        | N    | O     | F     | Si    | Cu   |
| on PVDF micro-particles      | 44.55                    | 0.00 | 8.91  | 43.49 | 3.04  | 0.00 |
| without PVDF micro-particles | 25.78                    | 0.00 | 42.46 | 0.00  | 31.75 | 0.00 |

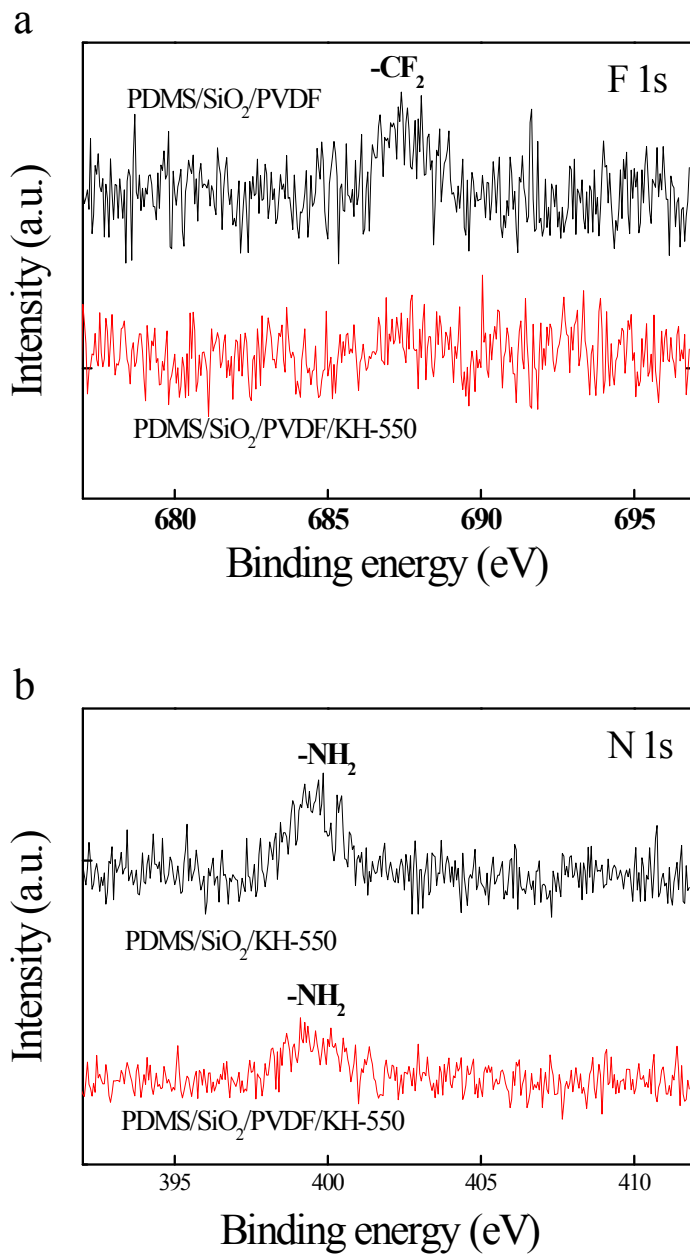

Fig. S3 (a) F 1s spectra of the PDMS/SiO<sub>2</sub>/PVDF and PDMS/SiO<sub>2</sub>/PVDF/KH-550 coatings. (b) N 1s spectra of the PDMS/SiO<sub>2</sub>/KH-550 and PDMS/SiO<sub>2</sub>/PVDF/KH-550 coatings.

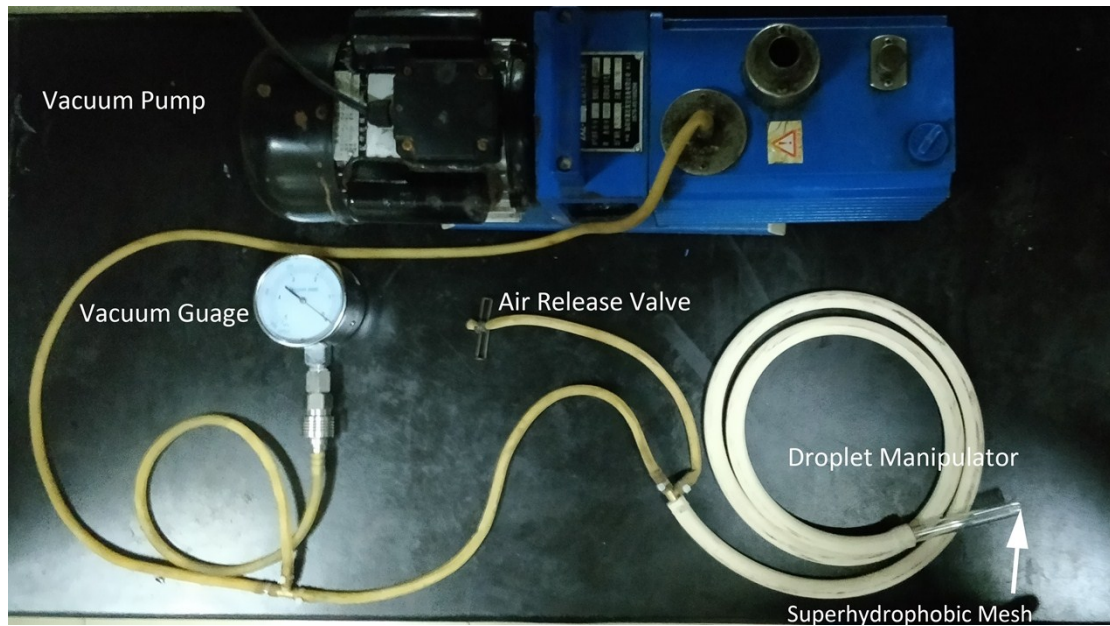

Fig. S4 The droplet manipulation device composed of a pump (providing the negative air pressure), a release valve (adjusting the pressure), a vacuum gauge (measuring the pressure), and a piece of superhydrophobic mesh (capturing the droplets).

Movie S1 A jet of water bounces off the coated mesh.

Movie S2 A water droplet (dyed by dark-blue ink) was put onto the coated mesh for 10 min, and then removed.

Movie S3 The mesh was inserted into dark-blue ink dyed water and lifted up.

Movie S4 The model contaminant (green chalk dust) was easily cleared away from the mesh.
